# Supplementary material for: Transcription of the var genes from a freshly-obtained field isolate of Plasmodium falciparum shows more variable switching patterns than long laboratory-adapted isolates
Source: Springer Nature journal article supplement (doi:10.1186/s12936-015-0565-y), 2015-02-06

a

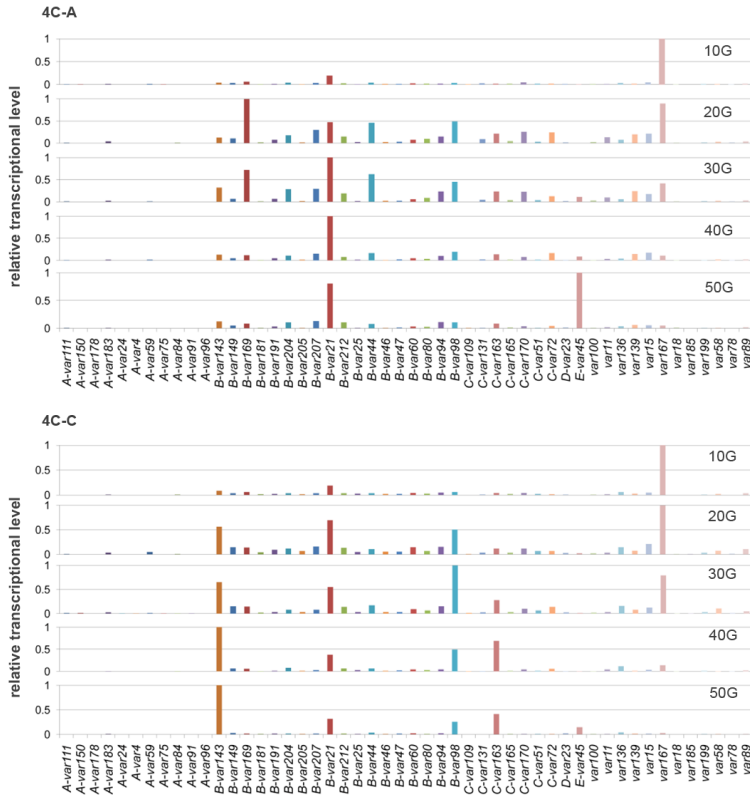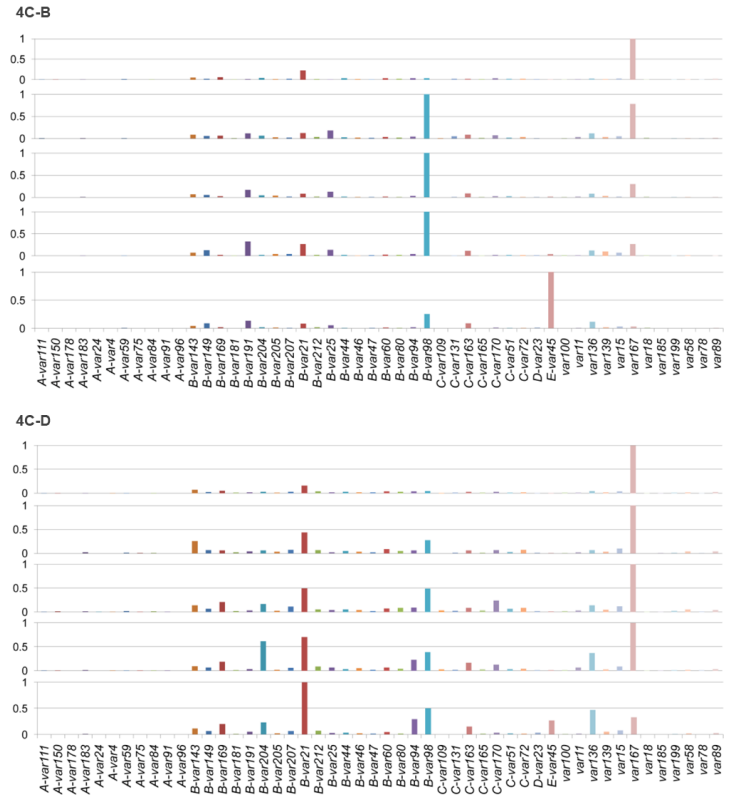

b

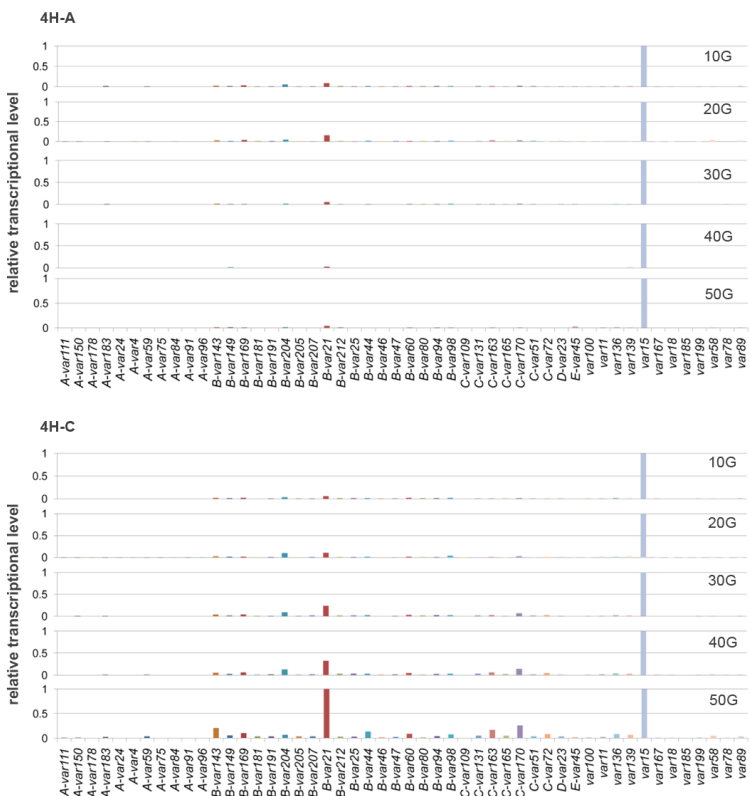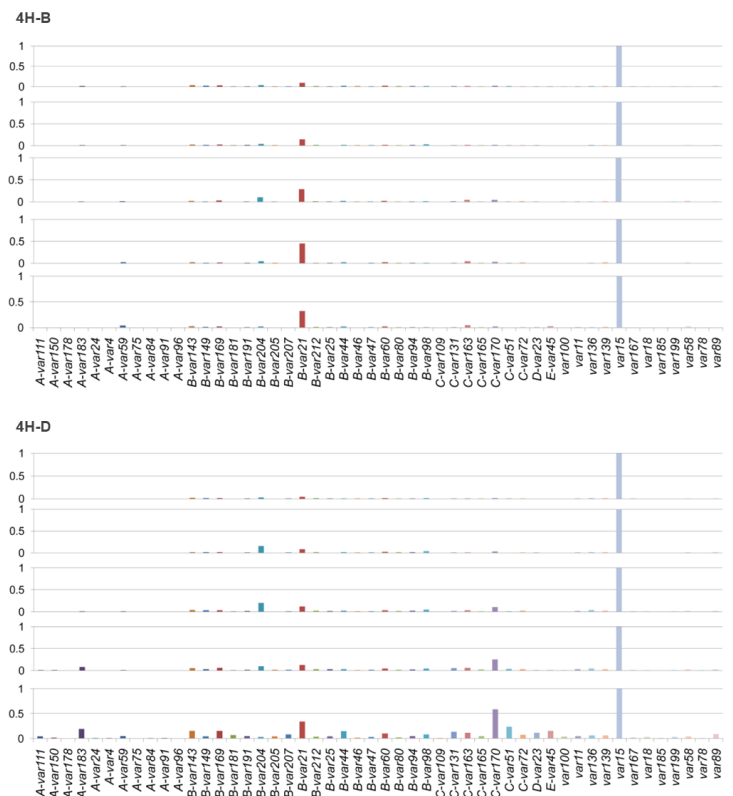

C

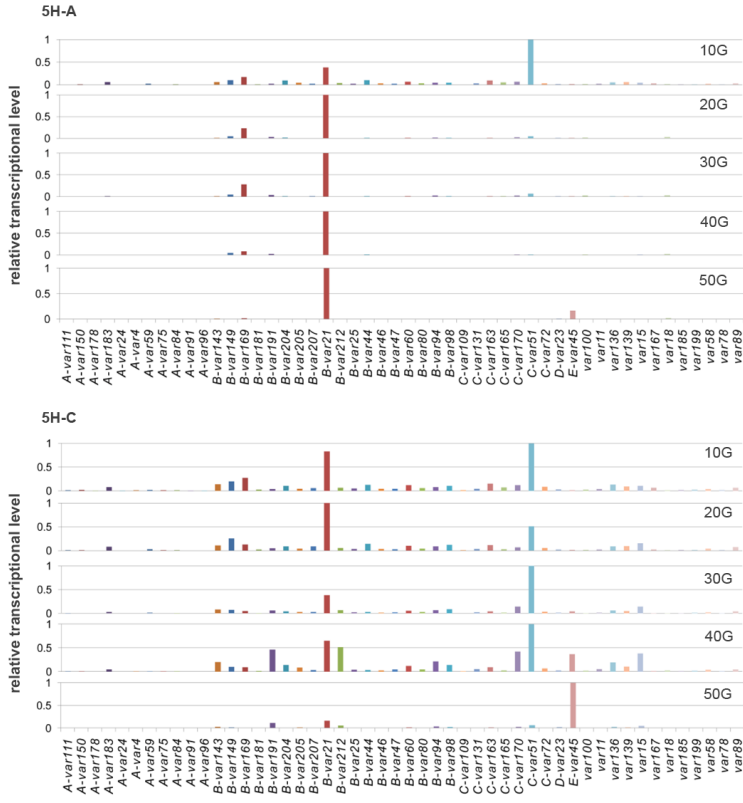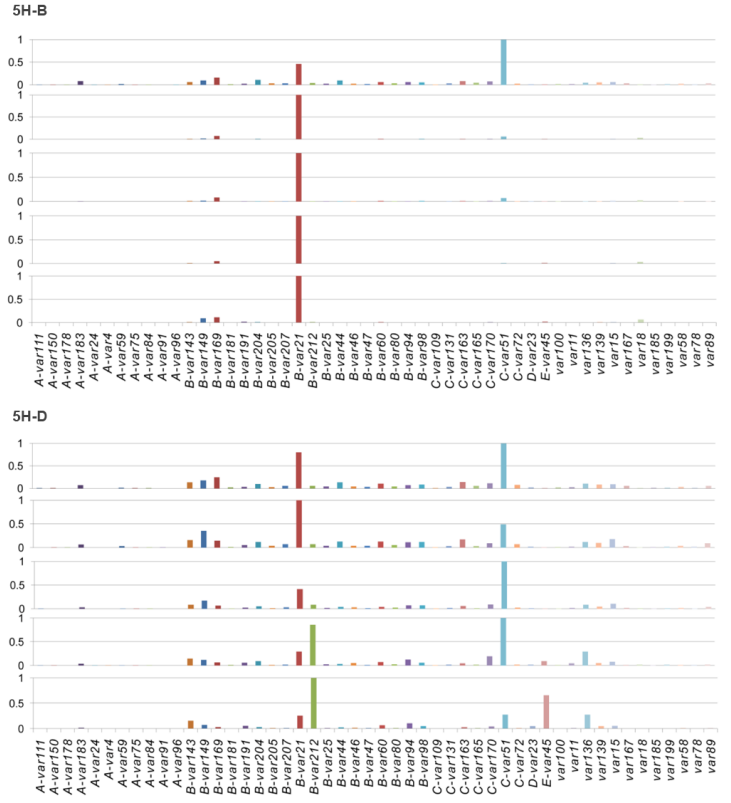

d

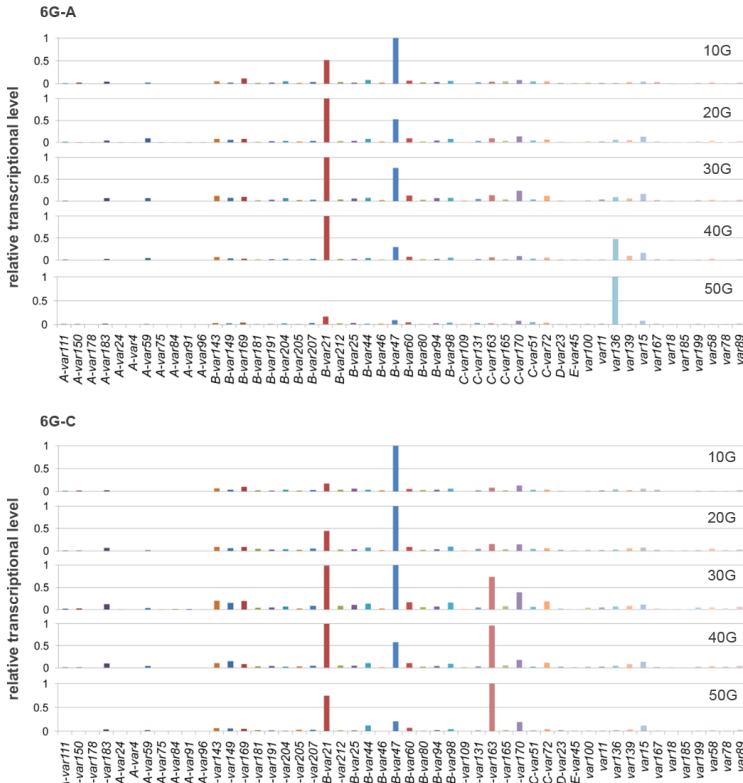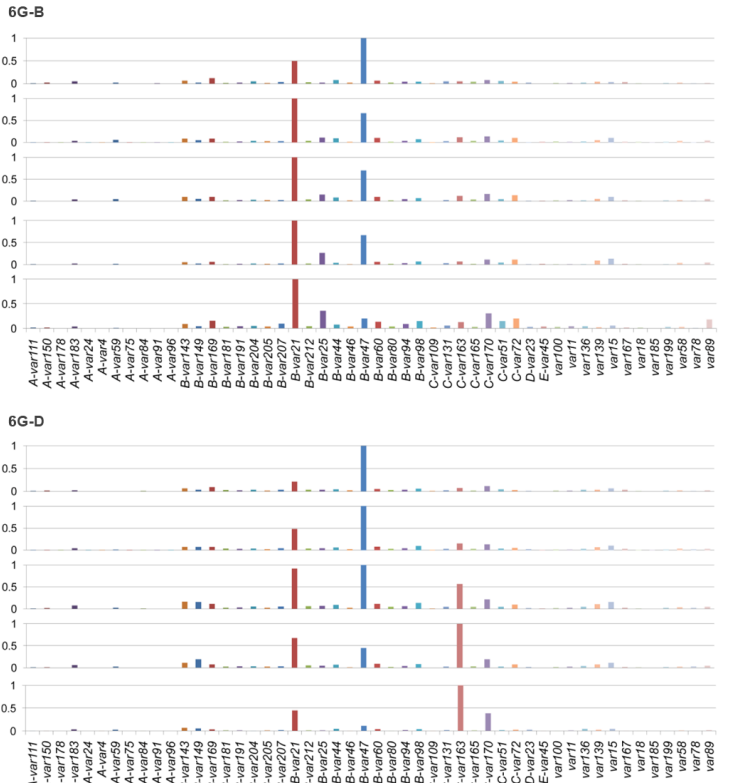

Supplement: MOESM3 [file 9761004]
